# Supplementary material for: Climatological assessment of the vertically resolved optical and microphysical aerosol properties by lidar measurements, sunphotometer, and in-situ observations over 17 years at UPC Barcelona
Source: Copernicus journal article supplement (doi:10.5194/egusphere-2023-893), 2023-05-22
Supplement: Supplementary file [file egusphere-2023-893-AC1-supplement.pdf]

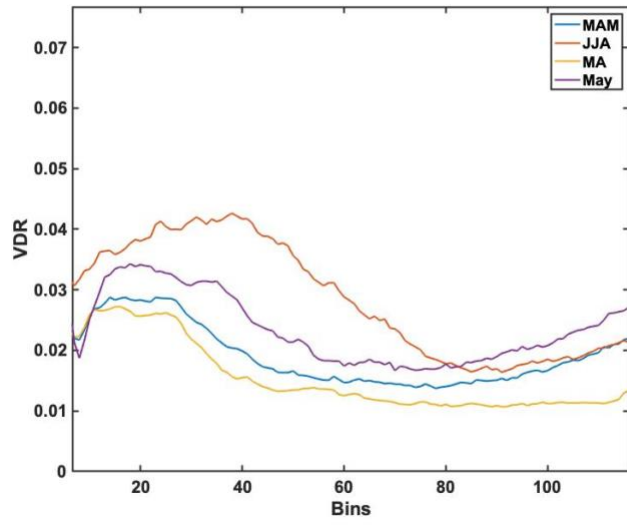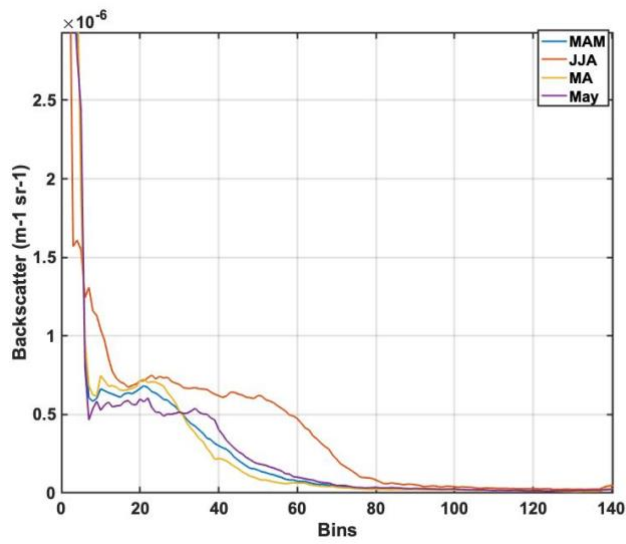

Both VDR and backscatter profile for MAM, JJA MA (without May) and May. 1 bin = 60m
